# Supplementary material
Source: publisher site journal article supplement (https://www.dovepress.com/article/405582)
Supplement: Supplementary file 1 [file get_supplementary_file.php]

**Observational Survey of Abattoir**

| **S. No** | **Variables** | **Standard** | **Actual** |
| --- | --- | --- | --- |
|  | Cross contamination as a result of layout | No |  |
|  | The number of toilets to the number of workers ratio | 1:05 |  |
|  | Cattle cleaning before to slaughter | Yes |  |
|  | Fasting and rest periods | 12-24hrs |  |
|  | Stunning techniques | Bolt |  |
|  | House room air conditioner | Must |  |
|  | Butchers' personal hygiene in general | Good |  |
|  | Equipment sanitation and sterility | Good |  |
|  | Washing with clean water on a regular basis while on work | Must |  |
|  | Facility for chilling/refrigeration | Sustainable |  |
|  | The renewal of a butcher's health certificate | Good |  |
|  | Butchers' knowledge of personal and food hygiene | Good |  |
|  | Personal hygiene and food-borne disease education or training | Good |  |
|  | Transporting meat and offal separately | Must |  |
|  | Vehicle cleaning program | Each shipment |  |
|  | Loading and unloading procedure | Over rail |  |

**Observational survey for butcher shops**

| **S. No** | **Variables** | **Yes** | **No** |
| --- | --- | --- | --- |
|  | Sanitation training |  |  |
|  | frequent sanitation of the butcher shop |  |  |
|  | Health certificate |  |  |
|  | Paper money handling |  |  |
|  | Use a separate cutting board for meat and internal and/or abdominal organs. |  |  |
|  | Using the same buckets of water for cleaning knives and hand washing |  |  |
|  | Using washable chopping board |  |  |
|  | Using clean knife and clean meat hanger |  |  |
|  | Skin rash, skin boils cut, diarrhoea and vomiting |  |  |
|  | Clean overcoat |  |  |
|  | Hair cover |  |  |
